# Supplementary material for: Laser-induced graphitization of polydopamine leads to enhanced mechanical performance while preserving multifunctionality
Source: Springer Nature journal article supplement (doi:10.1038/s41467-020-18654-8), 2020-09-24
Supplement: 41467_2020_18654_MOESM3_ESM.pdf [file 41467_2020_18654_MOESM3_ESM.pdf]

## **Description of Additional Supplementary Files**

File Name: Supplementary Movie 1

Description: The post-processing of the PDA film via BLA process.

File Name: Supplementary Movie 2

Description: The high-speed records of the PDA NPs removal with 8000 fps
